# Supplementary material
Source: publisher site journal article supplement (https://www.dovepress.com/article/388724)
Supplement: Supplementary file 1 [file get_supplementary_file.php]

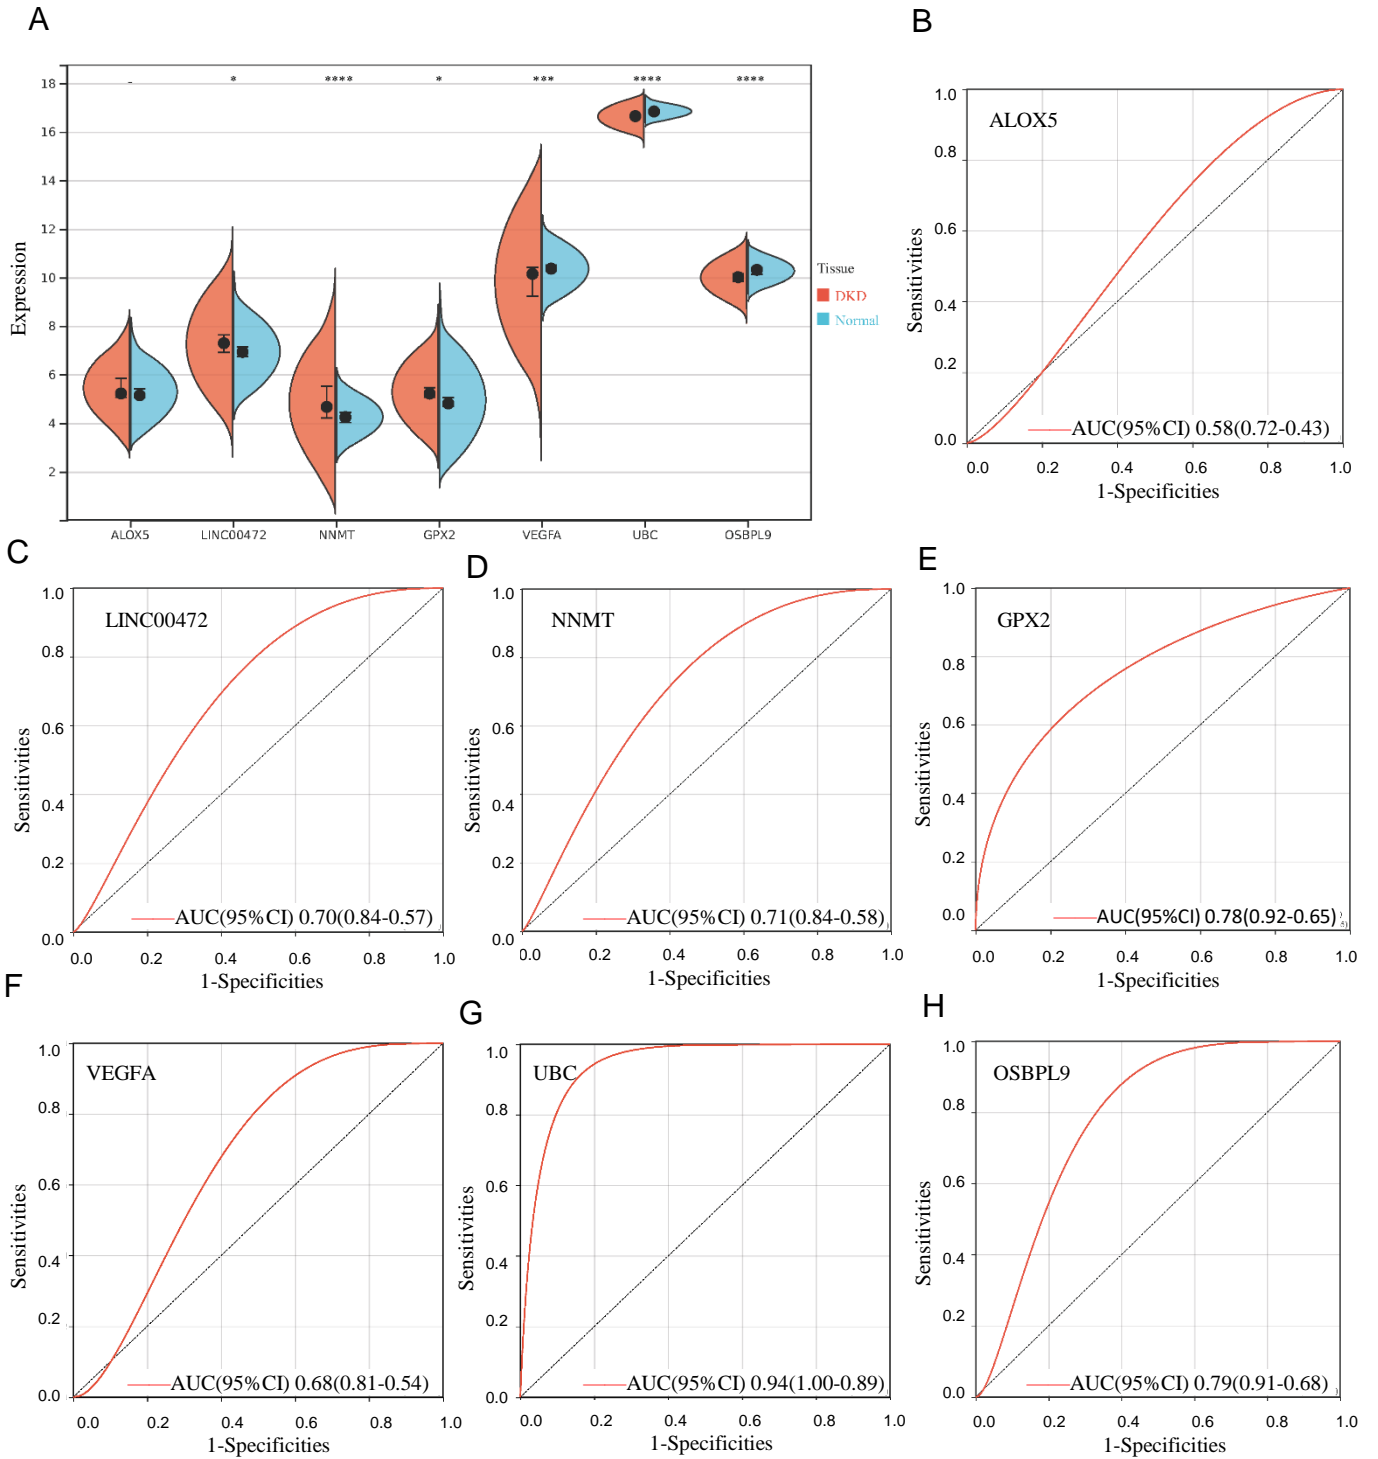

Supplementary Figure S1: The clinical diagnostic value of ferroptosis-related genes (FRGs) in the validation set. (A) The expression levels of FRGs between DKD patients and controls; (B-H) The ROC curves of ALOX5, LINC00472, NNMT, GPX2, VEGFA, UBC and OSBPL9, respectively.
